# Supplementary material for: LncRNA LINC01018/miR‐942‐5p/KNG1 axis regulates the malignant development of glioma in vitro and in vivo
Source: PubMed Central journal article supplement (PMC9873518; doi:10.1111/cns.14053), 2022-12-22

Full unedited gel/blot for Figure 1

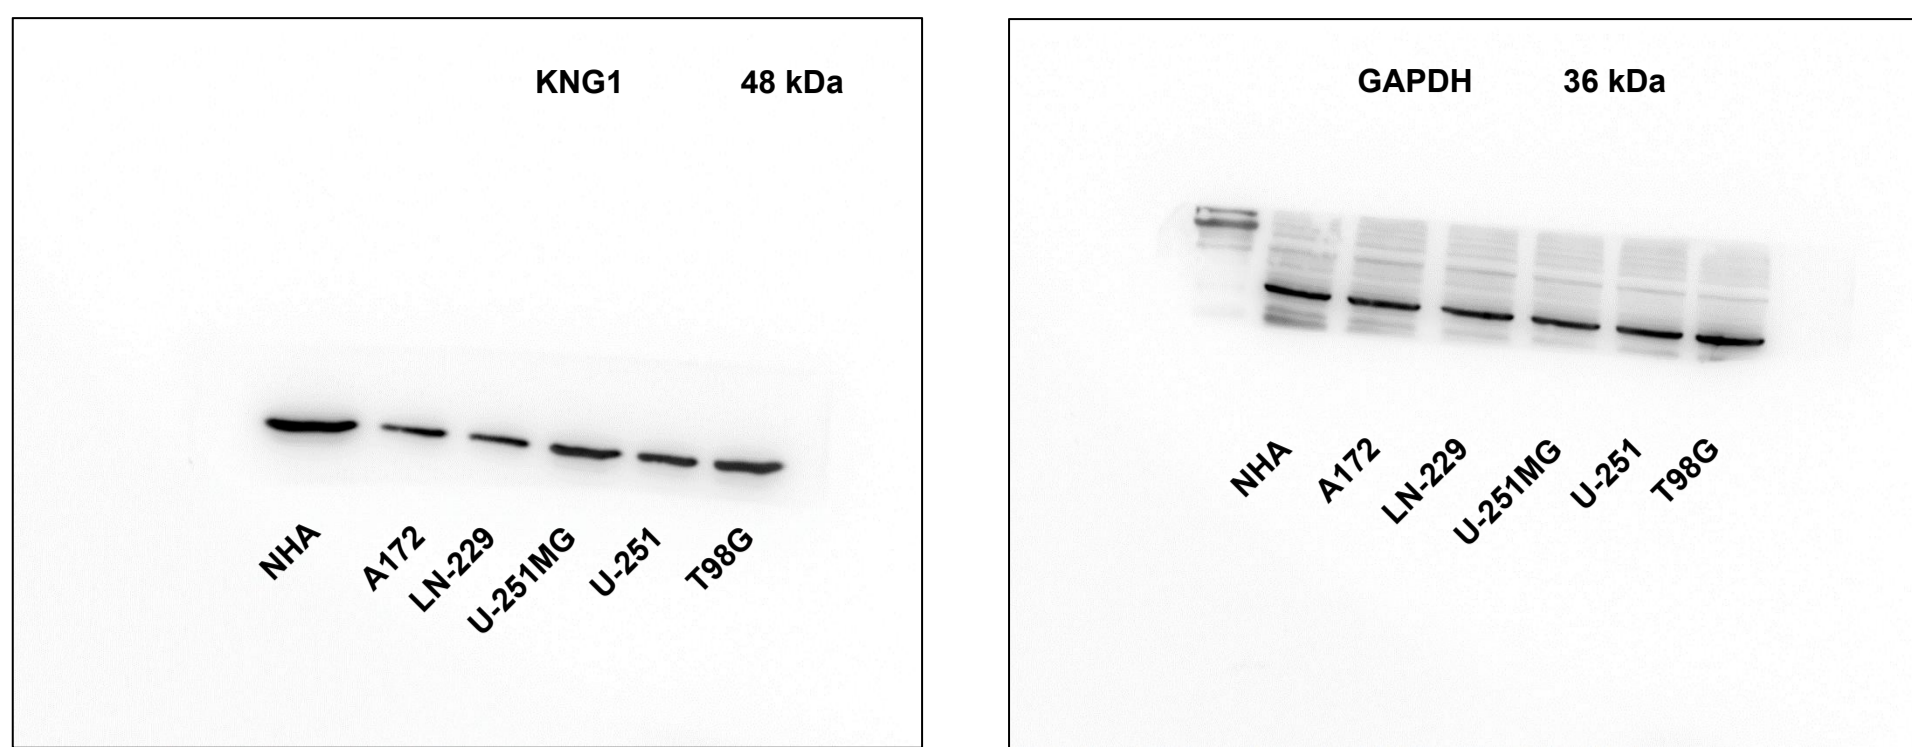

Full unedited gel/blot for Figure 2

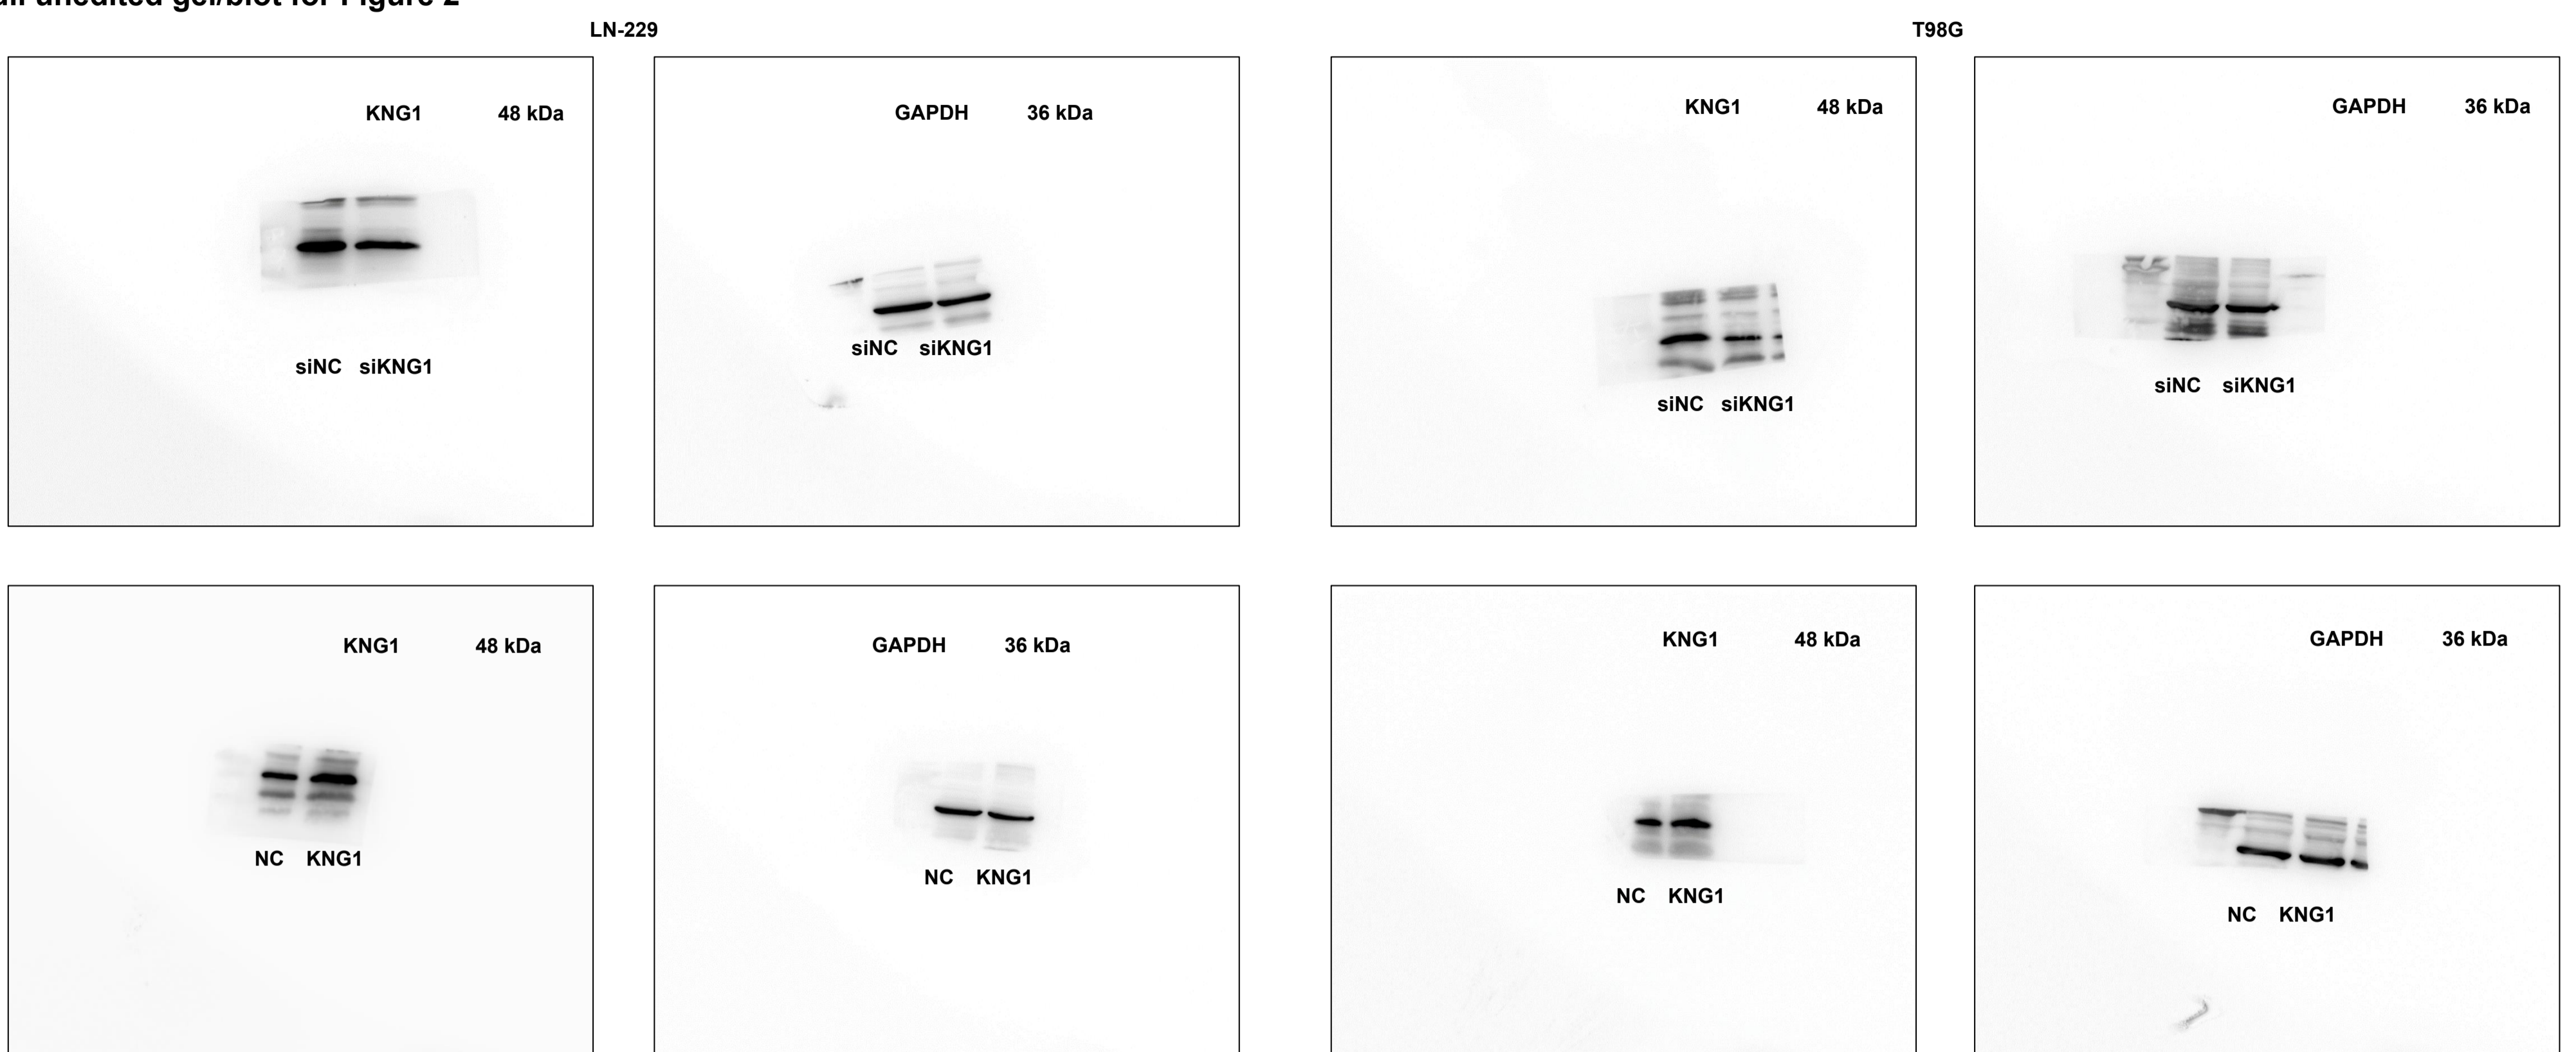

Full unedited gel/blot for Figure 4

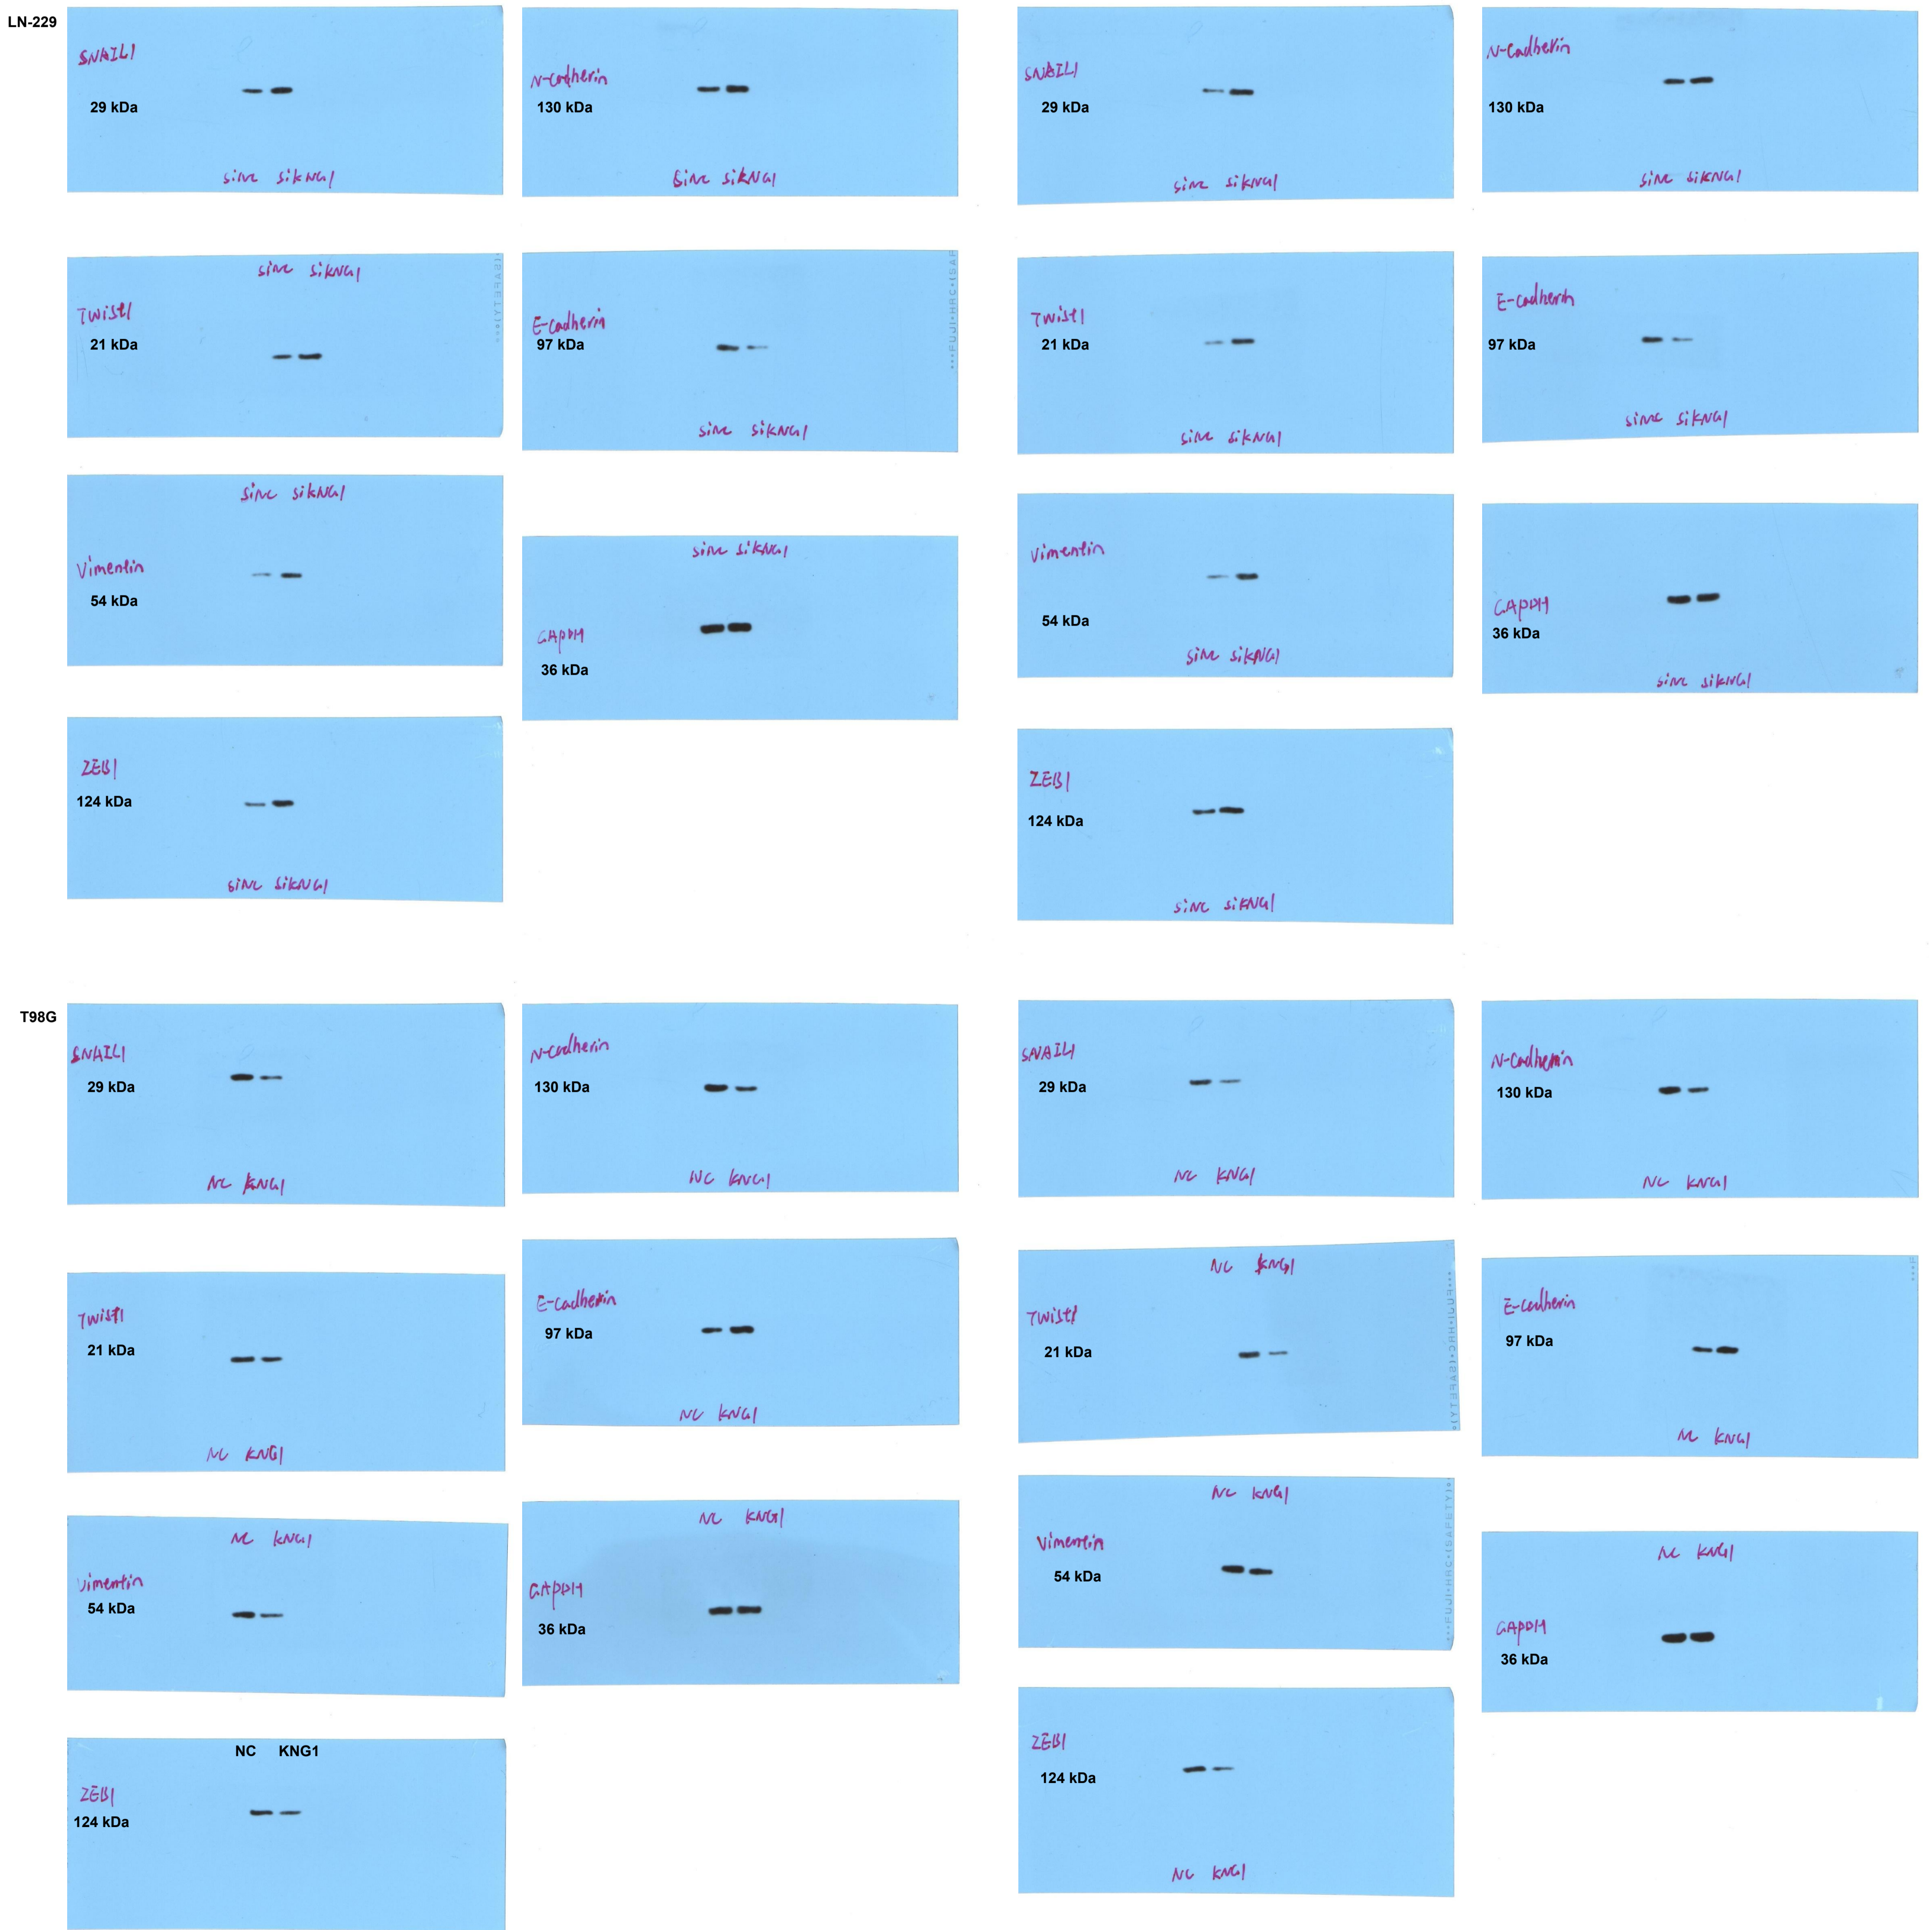

Full unedited gel/blot for Figure 5

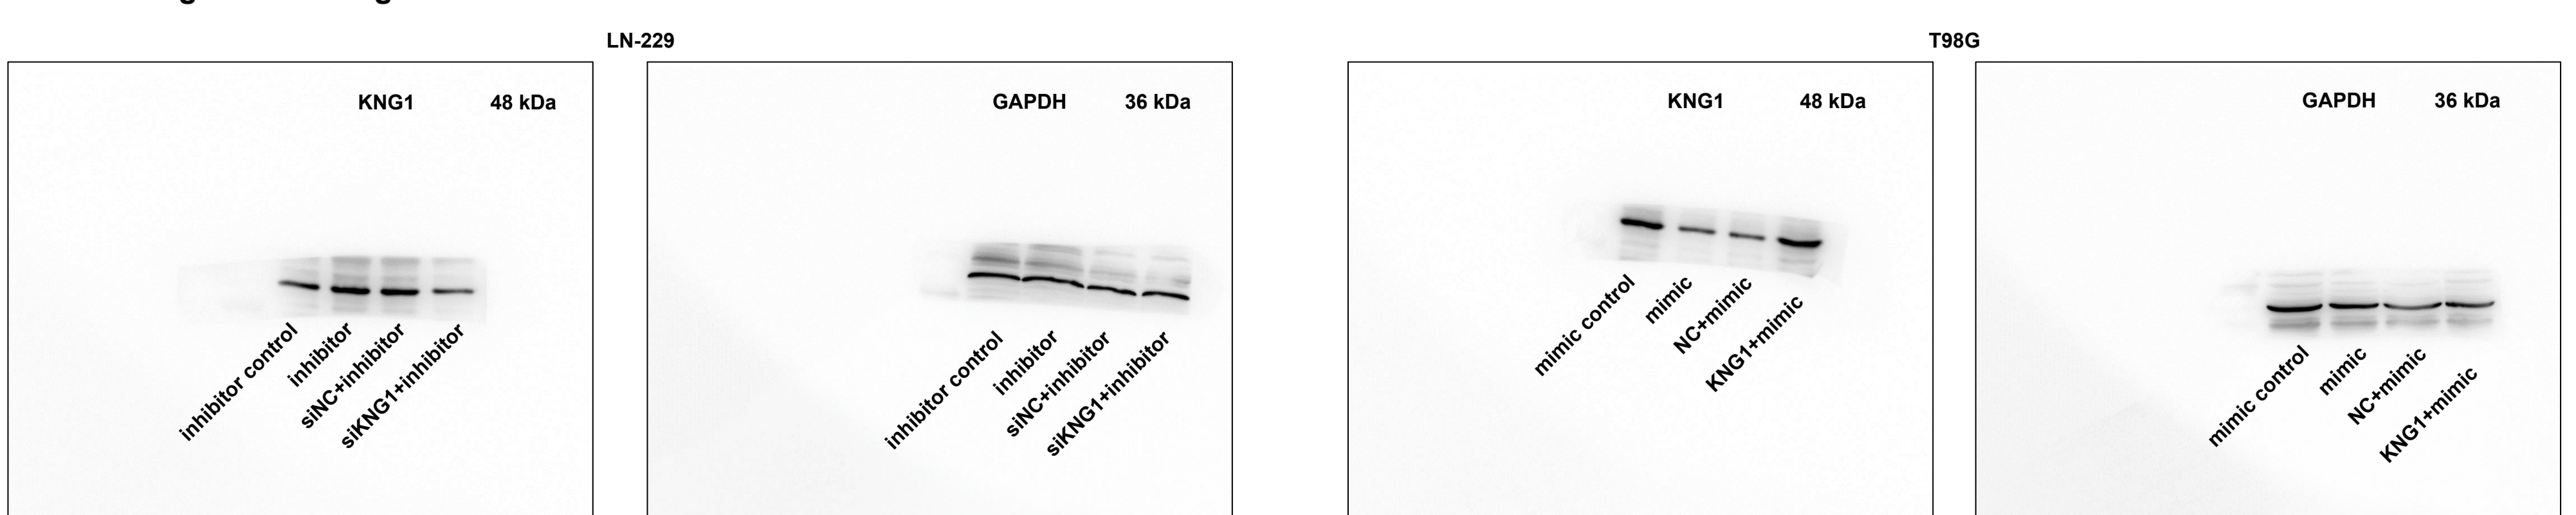

Full unedited gel/blot for Figure 9

Full unedited gel/blot for Figure 10

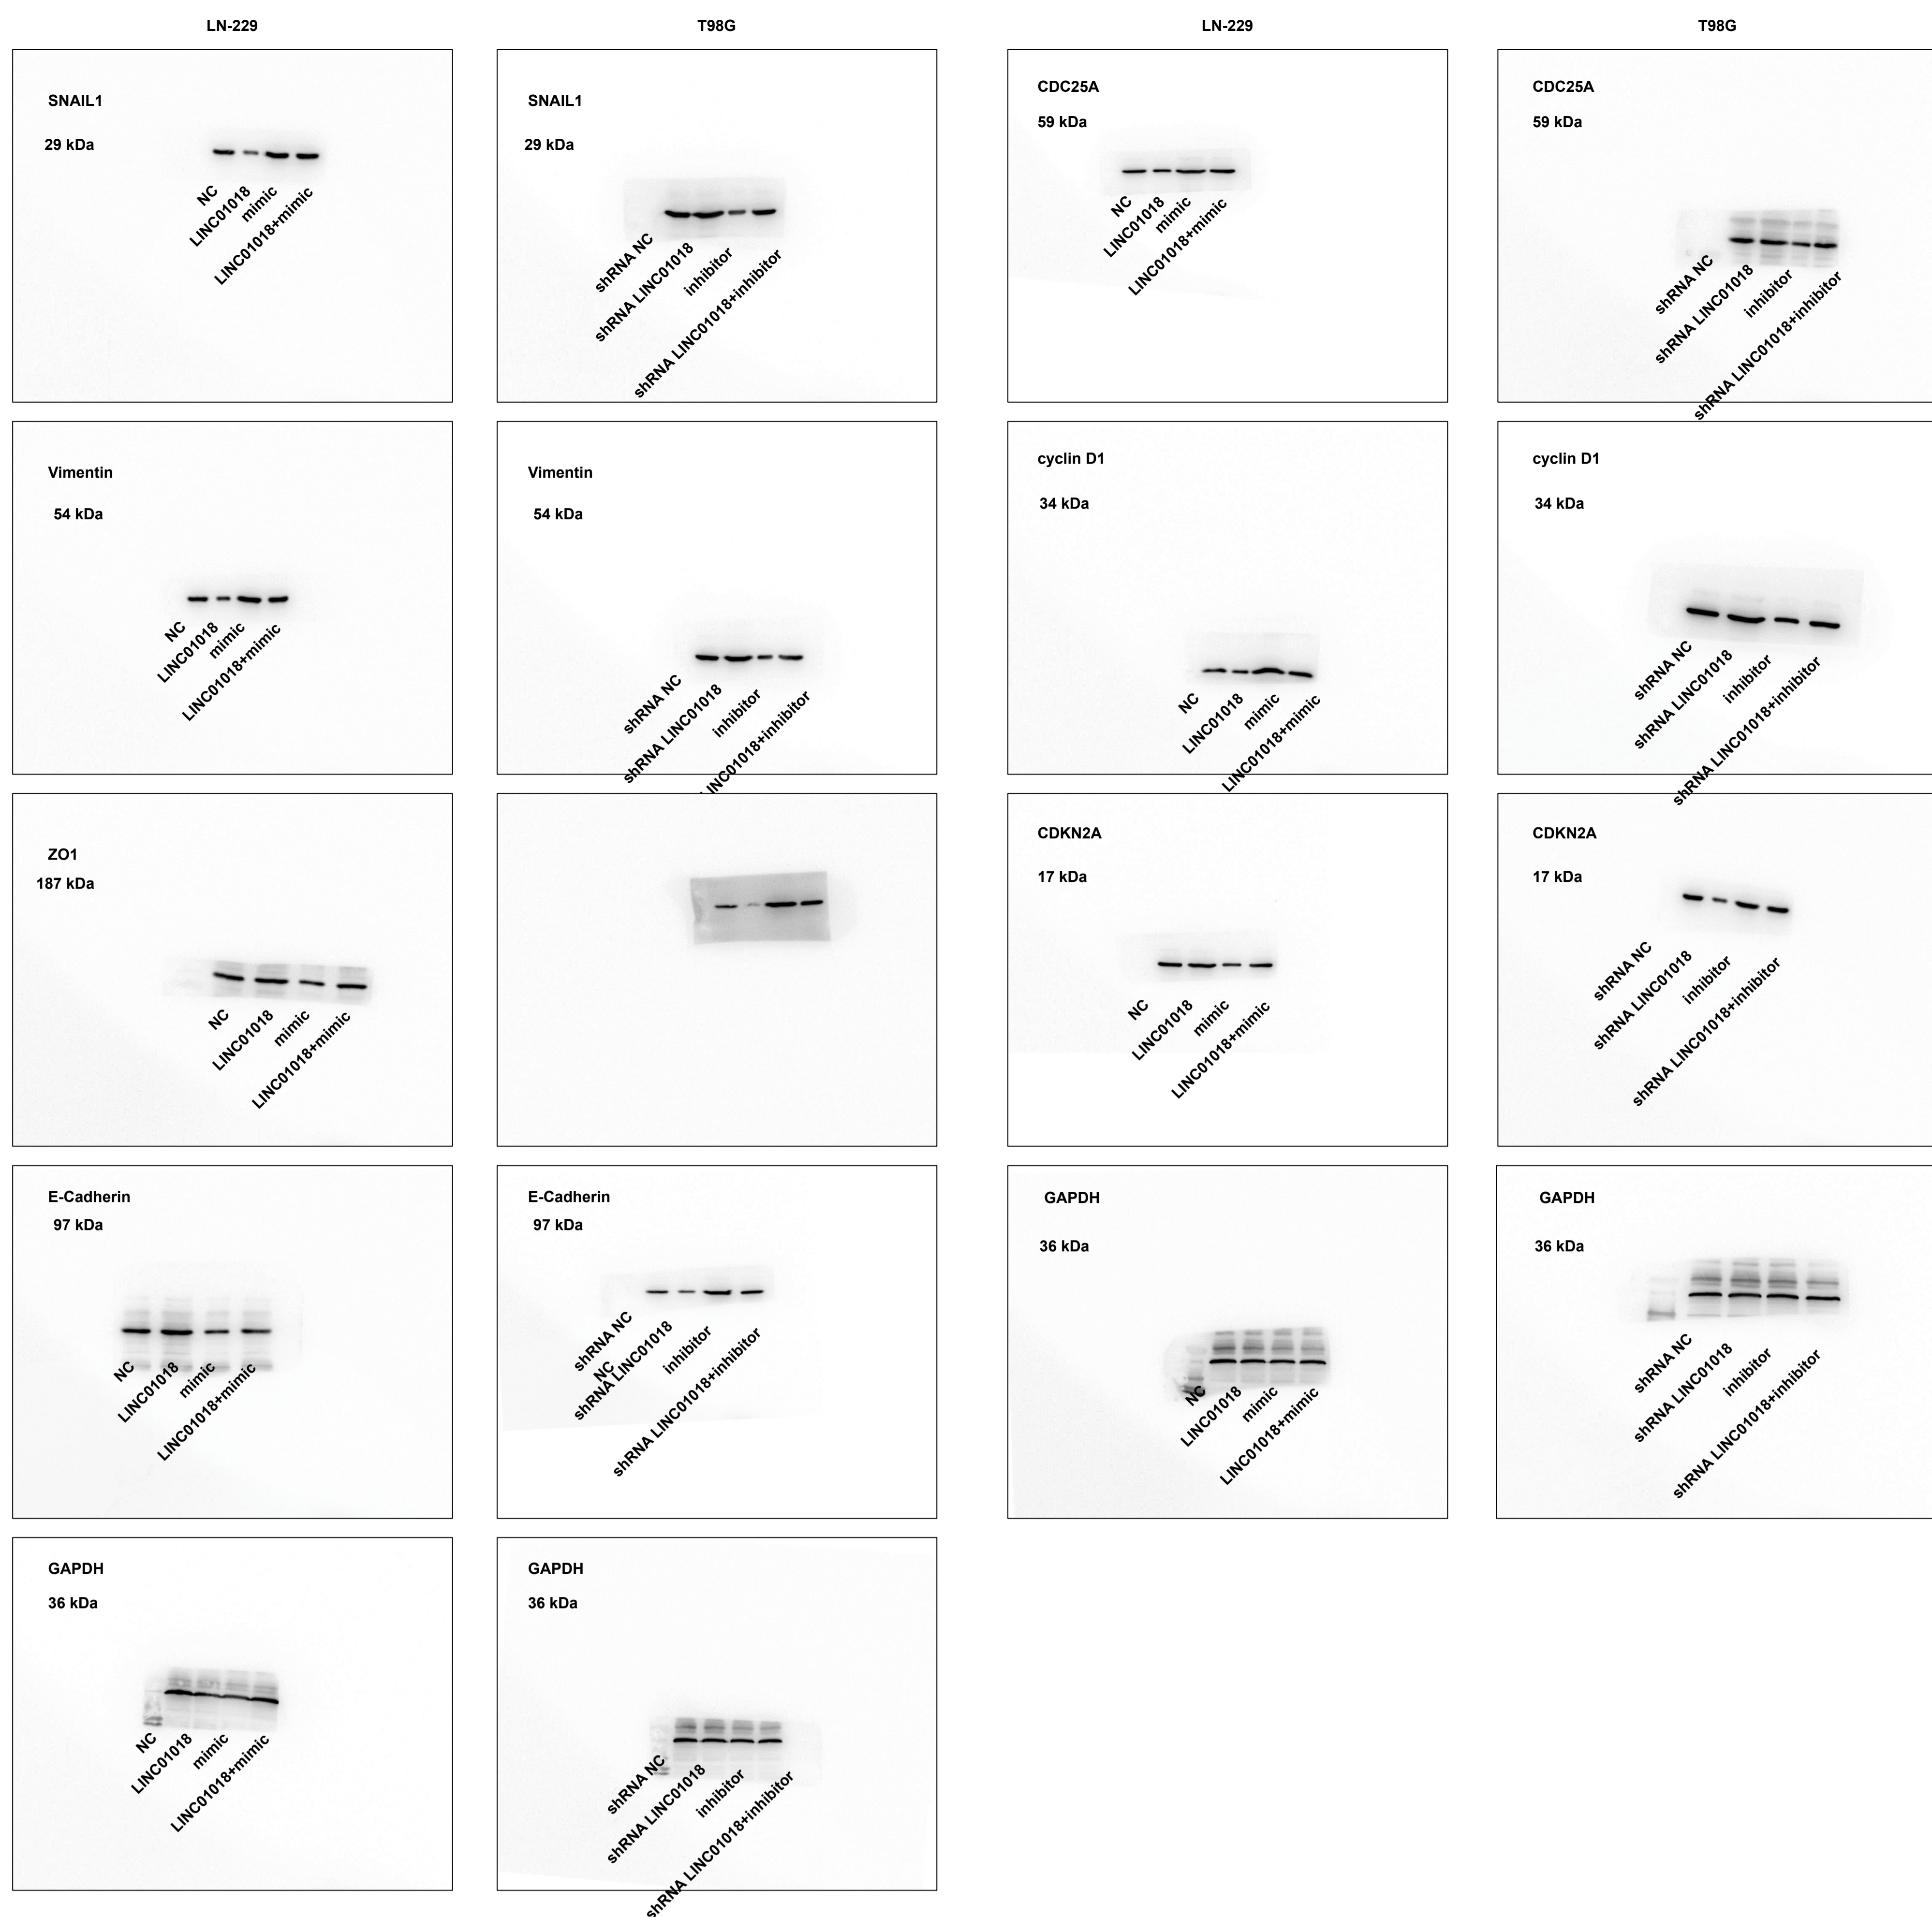

Full unedited gel/blot for Figure 12

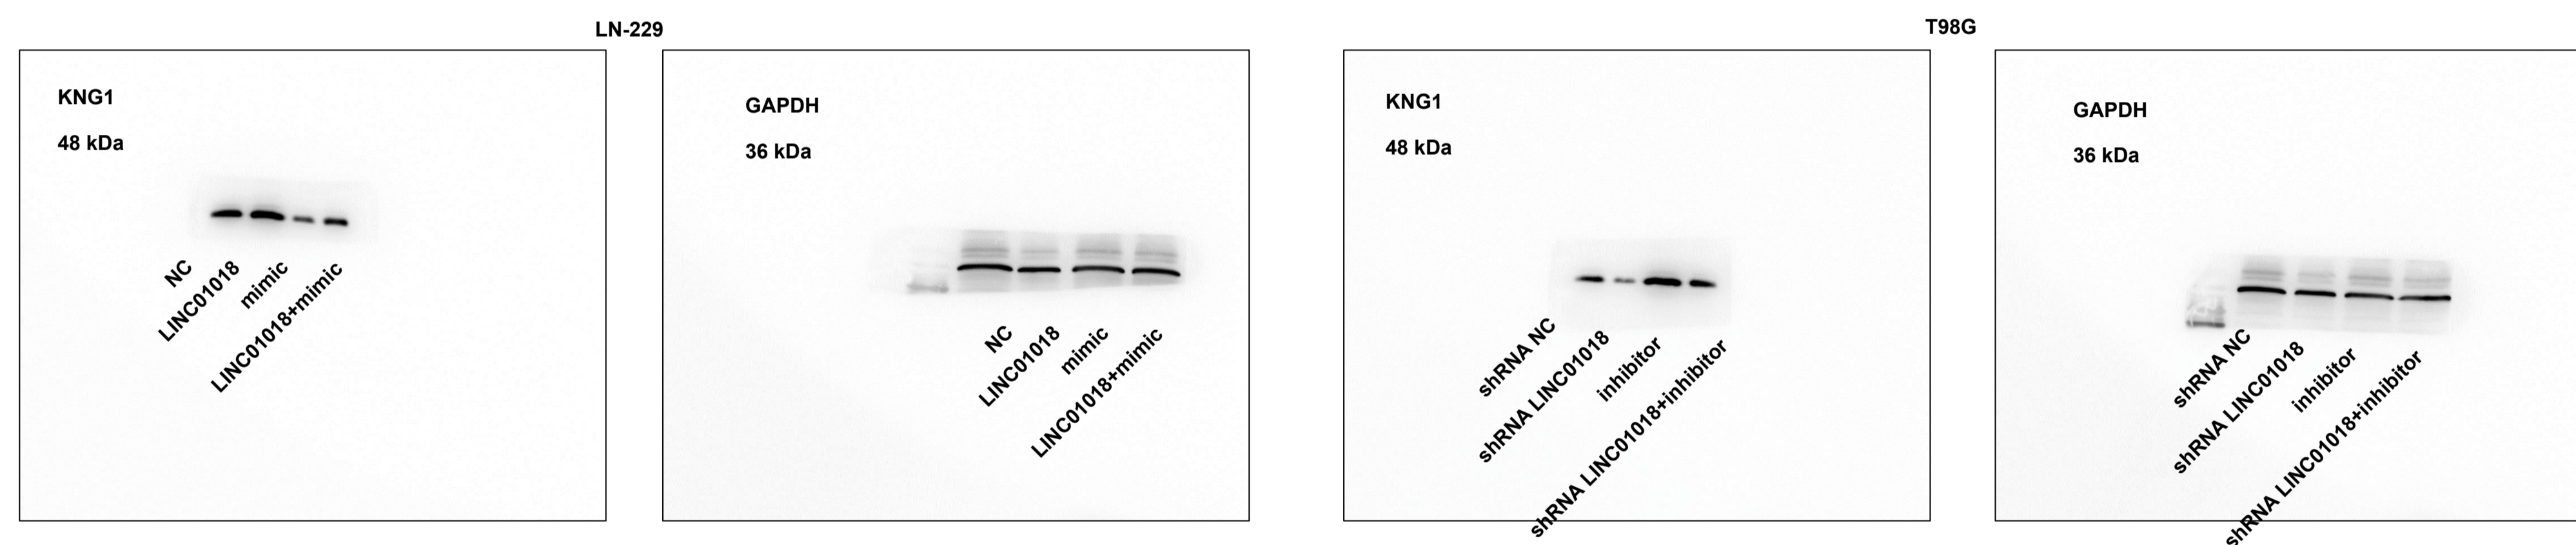

Supplement: CNS-29-691-s002.pdf [file CNS-29-691-s002.pdf]
